# Supplementary material for: Cloud–Aerosol Classification Based on the U-Net Model and Automatic Denoising CALIOP Data
Source: MDPI journal article supplement (doi:10.3390/rs16050904), 2024-03-04
Supplement: s1 [file s1]

Archive with 1 entries (1 files):
- remotesensing-2815371-supplementary.pdf
