# Supplementary material for: Cloud–Aerosol Classification Based on the U-Net Model and Automatic Denoising CALIOP Data
Source: MDPI journal article supplement (doi:10.3390/rs16050904), 2024-03-04
Supplement: s1 [file s1 › remotesensing-2815371-supplementary.pdf]

Supplement of

## Cloud–Aerosol Classification Based on the U-Net Model and Automatic Denoising CALIOP Data

**Table S1.** Denoising Evaluation of 532nm Perpendicular Attenuated Backscatter

| Denoising Techniques  | SNR   | RMSE  | SSIM  |
|-----------------------|-------|-------|-------|
| Gaussian filtering    | 4.089 | 0.050 | 0.983 |
| Three-point smoothing | 2.419 | 0.061 | 0.974 |
| Bilateral filtering   | 5.621 | 0.042 | 0.989 |
| Median filtering      | 4.343 | 0.049 | 0.985 |

**Table S2.** Denoising Evaluation of 1064nm Attenuated Backscatter

| Denoising Techniques  | SNR   | RMSE  | SSIM  |
|-----------------------|-------|-------|-------|
| Gaussian filtering    | 2.918 | 0.018 | 0.995 |
| Three-point smoothing | 1.142 | 0.022 | 0.993 |
| Bilateral filtering   | 3.799 | 0.016 | 0.996 |
| Median filtering      | 3.307 | 0.017 | 0.996 |

Through the application of four denoising methods on 532nm Perpendicular Attenuated Backscatter and 1064nm Attenuated Backscatter, SNR, RMSE, and SSIM evaluation results were obtained, as shown in Table S1 and S2. The outcomes indicate that bilateral filtering exhibits the best performance for both 532nm Perpendicular Attenuated Backscatter and 1064nm Attenuated Backscatter, with evaluation results of 5.621, 0.042, 0.989, and 3.799, 0.016, 0.996, respectively.

**Table S3.** Evaluating the Accuracy of Models Trained on Different Denoised Datasets

| Denoising Techniques  | Accuracy |
|-----------------------|----------|
| Unreduced data        | 0.933    |
| Gaussian filtering    | 0.948    |
| Three-point smoothing | 0.938    |
| Bilateral filtering   | 0.953    |

|                  |       |
|------------------|-------|
| Median filtering | 0.945 |
|------------------|-------|

For a better comparison of different denoising methods, data processed by various denoising techniques were fed into the U-Net model. Table S3 presents the evaluation of model accuracy trained on different denoised datasets. It is evident that models constructed from denoised data exhibit higher accuracy compared to the non-denoised data. Among these methods, bilateral filtering demonstrates the best performance, achieving a U-Net model accuracy of 0.953.

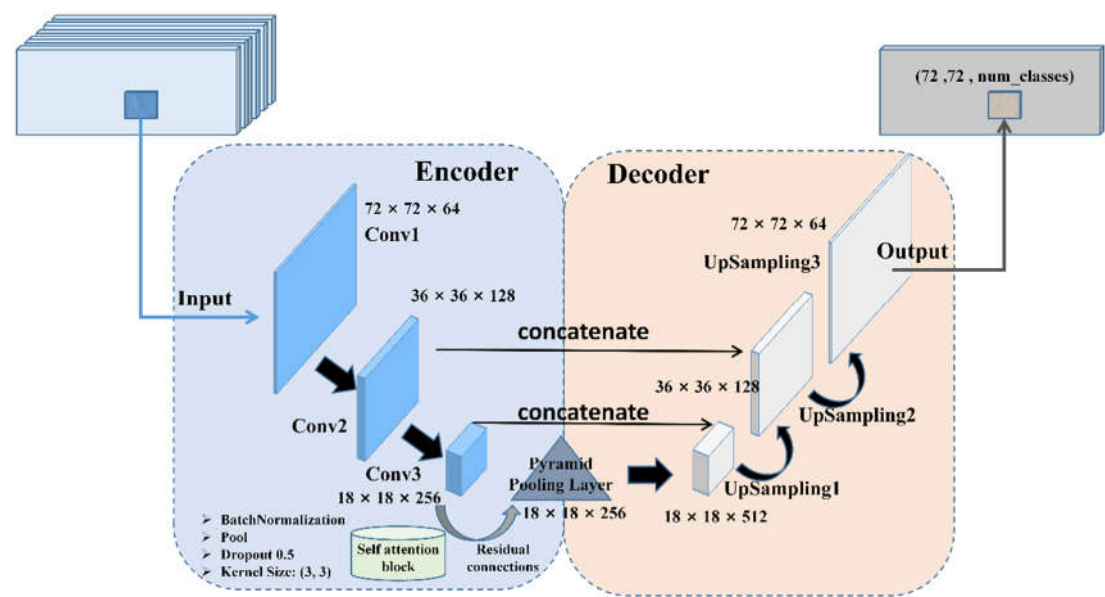

**Figure. S1** U-Net model structure.

The U-Net model construction diagram in Figure S1 is consistent with the main text's Figure 1. However, it features higher resolution and clearer details.

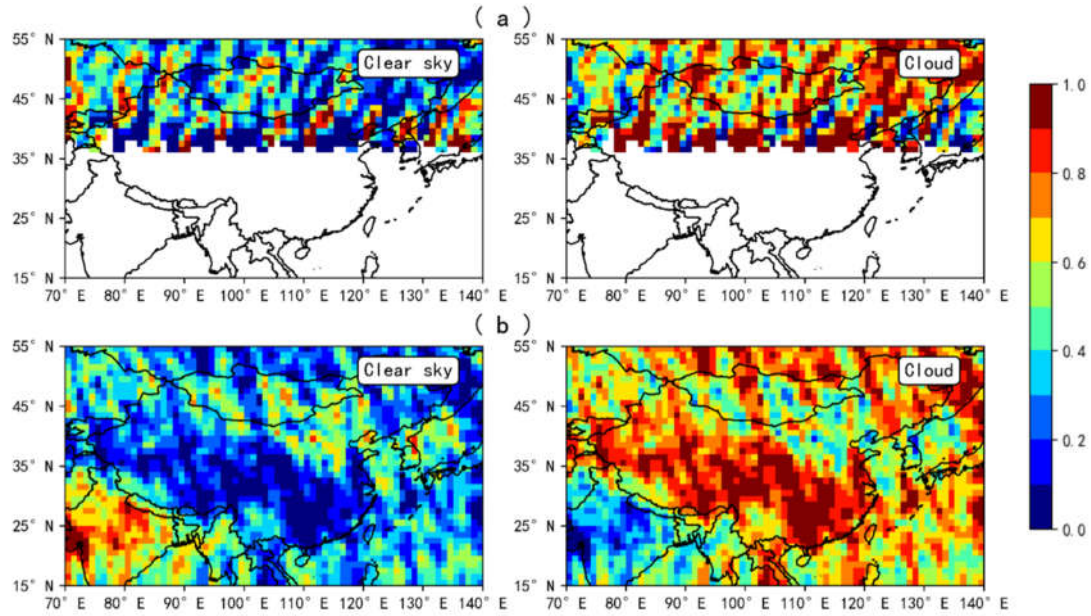

**Figure. S2** Cloud fraction maps generated by the CloudSat satellite's 2B-CLDCLASS-LIDAR product for the period from March 1 to May 31, 2019. (a) Nighttime; (b) Daytime. Significant missing values are present in the nighttime data.

The study conducted a statistical analysis of the 2B-CLDCLASS-LIDAR product from the Cloudsat satellite for the period of March to May 2019, as illustrated in Figure S2. The aim was to compare it with the cloud identification results obtained from the U-Net model. However, it was observed that there is some missing nighttime data in the 2B-CLDCLASS-LIDAR product within this time range, while the daytime data remains intact.

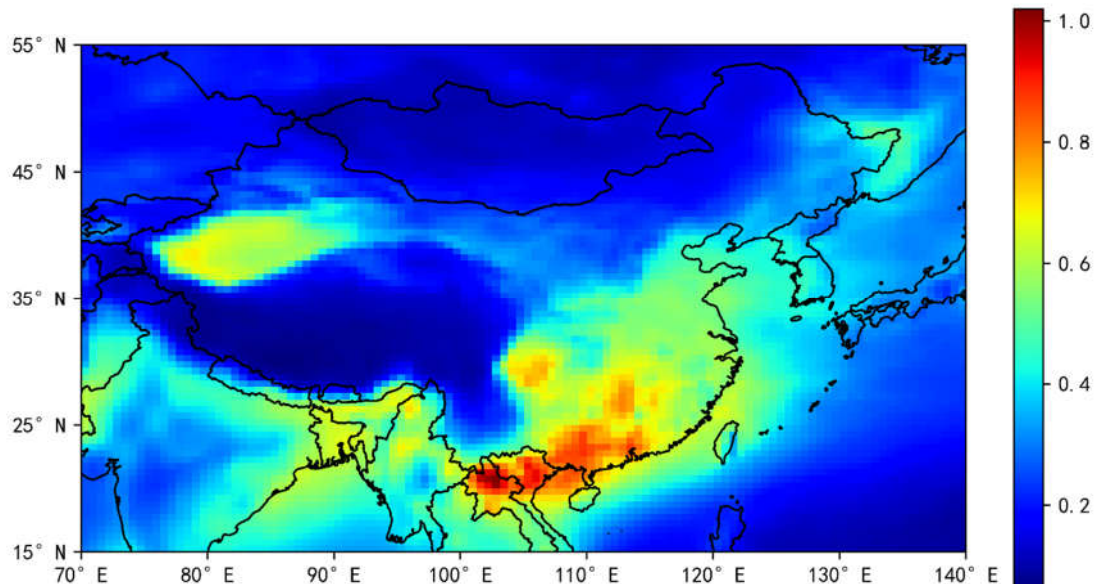

**Figure. S3** The monthly average Aerosol Optical Depth in MIRA2 during nighttime observations from March to May 2019.

Figure S3 displays The monthly average Aerosol Optical Depth in MIRA2 during

46     nighttime observations from March to May 2019, offering valuable reference information.
